# Supplementary material for: Carbon dot-modified silver nanoparticle electrochemical sensors for the ultrasensitive detection of total malachite green and leucomalachite green residues in fish
Source: Royal Society of Chemistry journal article supplement (doi:10.1039/d6ra01261b), 2026-03-30
Supplement: d6ra01261b1.pdf [file d6ra01261b1.pdf]

## SUPPORTING INFORMATION

### Carbon dot-modified silver nanoparticle electrochemical sensor for ultrasensitive detection of total malachite green and leucomalachite green residues in fish.

Pomi Bi Boussou Narcisse<sup>a</sup>, Aka Alla Martin<sup>a</sup>, Essy Kouadio Fodjo<sup>\*a</sup>, Guangxin Yang<sup>b</sup>, Cong Kong<sup>b</sup>, Zhen Gu<sup>c</sup>, Koffi Koffi Kra Sylvestre<sup>a</sup>, Irié Bi Irié Williams<sup>a</sup>

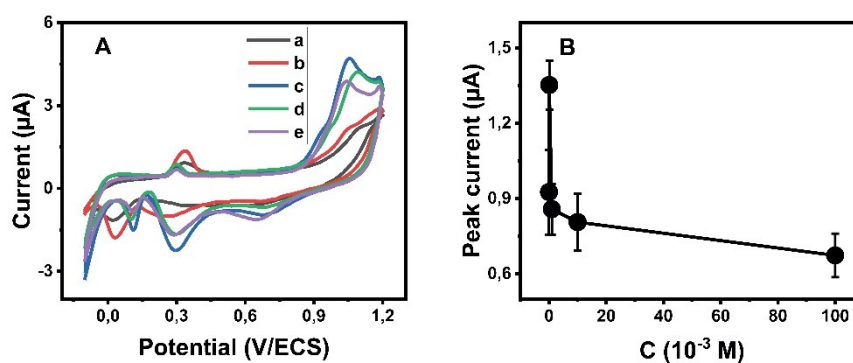

**Fig. S1** A) Cyclic voltammograms of AgCQDs/Au in the presence of (a) 10<sup>-5</sup> M; (b) 10<sup>-4</sup> M; (c) 10<sup>-3</sup> M; (d) 10<sup>-2</sup> M and (e) 10<sup>-1</sup> M of Na<sub>2</sub>SO<sub>4</sub> with 2.5 ng/mL of each MG and LMG in their mixture at 50 mV/s. B) Intensity of the oxidation current peak as a function of Na<sub>2</sub>SO<sub>4</sub> concentration.

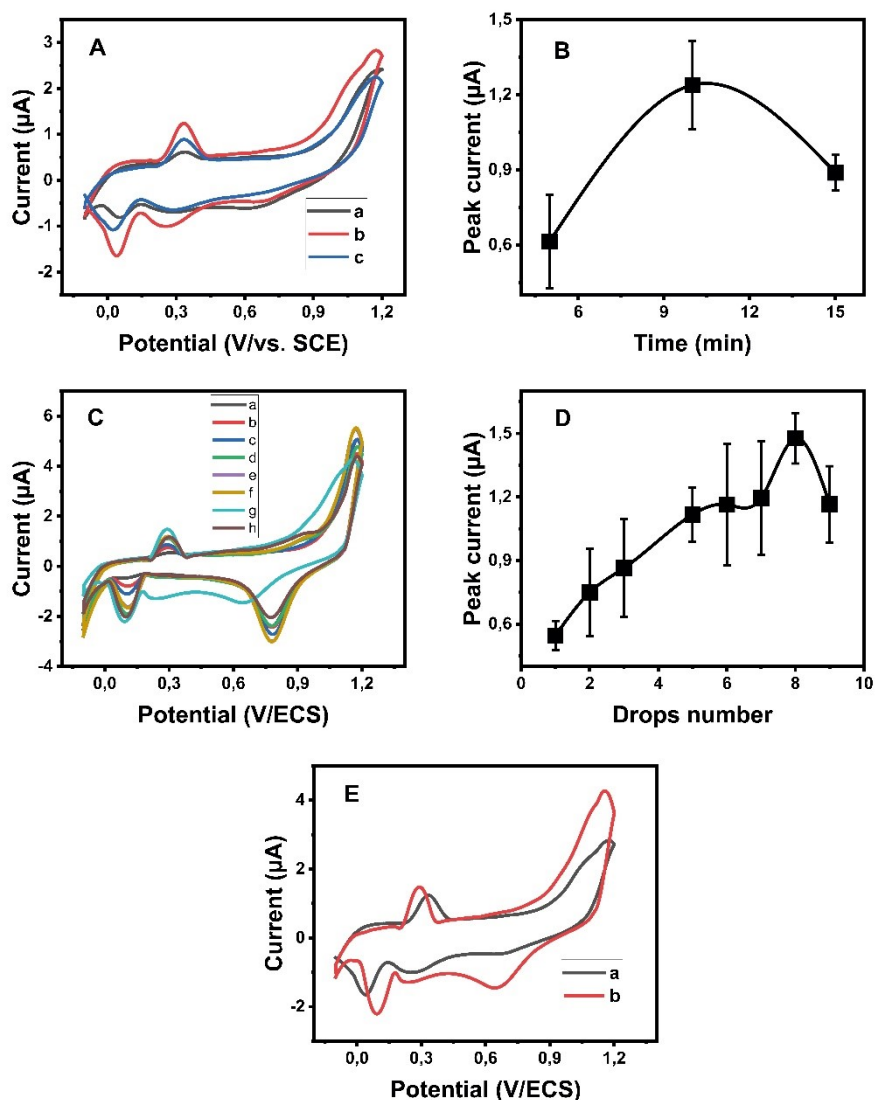

**Fig. S2:** A) Cyclic voltammograms recorded in  $10^{-4}$  M  $\text{Na}_2\text{SO}_4$  solution at 50 mV/s in the presence of 2.5 ng/mL of each MG and LMG in their mixture at different immersion times of the Au electrode in the colloidal solution of AgCDs. B) Peak current intensity as a function of immersion time (a) 5, (b) 10 and (c) 15 min. C) Cyclic voltammograms recorded in  $10^{-4}$  M  $\text{Na}_2\text{SO}_4$  solution at 50 mV/s in the presence of 2.5 ng/mL of each MG and LMG in the mixture for different number of drops of colloidal AgCDs solution on the surface of the Au electrode. D) Peak current intensity as a function of the number of droplets deposited from (a) 1 drop to (h) 8 drops. E) Superposition of the voltammograms obtained for (a) 10 min of immersion and (b) deposition of 8 drops.

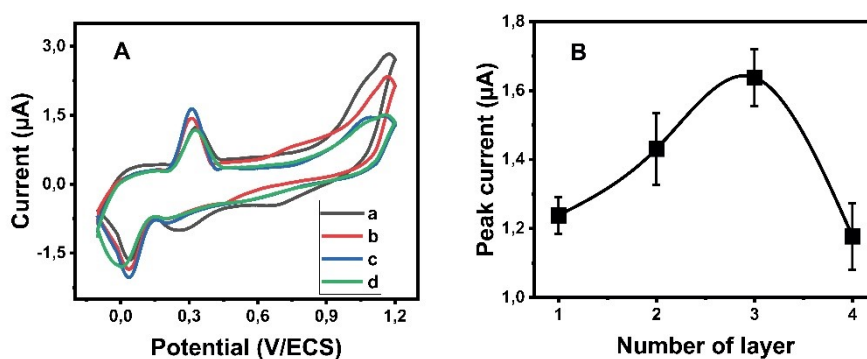

**Fig. S3** A) Cyclic voltammograms of the AgCDs/Au electrode obtained from deposition of a) one layer, b) two layers c) three layers and d) four layers of AgCDs on the Au electrode in a  $10^{-4}$  M  $\text{Na}_2\text{SO}_4$  solution at 50 mV/s containing 2.5 ng/mL of each MG and LMG in the mixture. B) Peak current intensity of the MG and LMG mixture oxidation as a function of the number of layers.

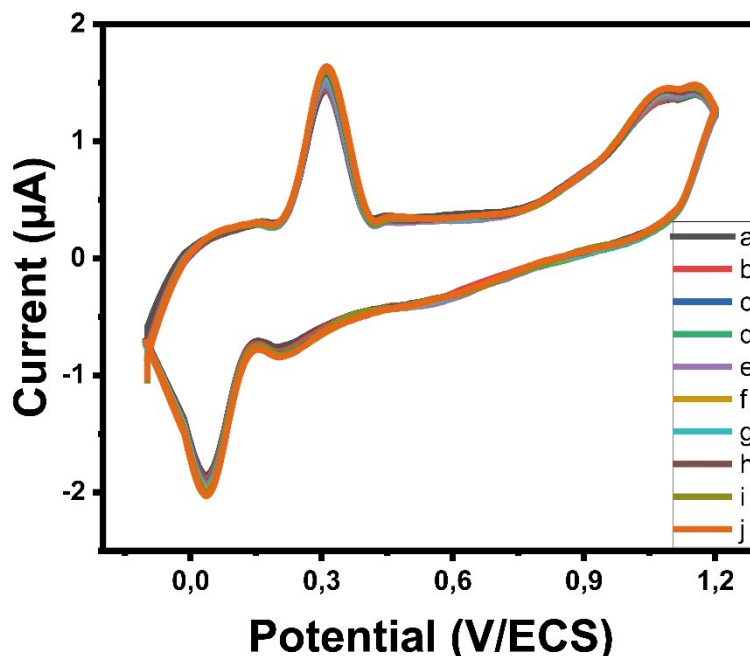

**Fig. S4** Stability study of the AgCDs/Au electrode.

**Table S1** Recovery using the fabricated sensor (n=3)

| Added (ng/mL) | Found (pg/mL) <sup>a</sup> | recovery (%) |
|---------------|----------------------------|--------------|
| 6             | 5.88                       | 98±1.5       |
| 10            | 9.92                       | 99.2±2       |
| 15            | 14.93                      | 99.5±3.6     |
| 25            | 24.96                      | 99.4±5.7     |
| 35            | 34.96                      | 99.8±2.1     |
| 45            | 44.92                      | 99.8±6.0     |
| 55            | 54.95                      | 99.9±8.1     |

<sup>a</sup> Average value of recovered MG concentration.

**Table S2** Recovery rate of 10 pg/mL MG in the presence of 100 pg/mL of the selected interfering compounds (n=3).

| Compounds | C(pg/mL) <sup>a</sup> | C(pg/mL) <sup>b</sup> | Recovery (%) |
|-----------|-----------------------|-----------------------|--------------|
| MG        | 10                    | 10                    | 100          |
| CAP       | 10                    | 9.98                  | 99.8         |

| ARTICLE                           |    |      | Journal Name |
|-----------------------------------|----|------|--------------|
| p-DAP                             | 10 | 9.98 | 99.8         |
| Bovine serum albumin              | 10 | 9.95 | 99.5         |
| Cod liver oil                     | 10 | 9.92 | 99.2         |
| CuSO <sub>4</sub>                 | 10 | 9.94 | 99.4         |
| FeSO <sub>4</sub>                 | 10 | 9.97 | 99.7         |
| Zn(NO <sub>3</sub> ) <sub>2</sub> | 10 | 9.95 | 99.5         |
| NaCl                              | 10 | 9.87 | 98.7         |

C<sup>a</sup>: Concentration added. C<sup>b</sup>: Concentration found

**Table S3:** Intra-day and Inter-day studies (n=3).

| Concentration added (pg/mL) | Concentration found (pg/mL) |           | RSD (%) (n=3) |           |
|-----------------------------|-----------------------------|-----------|---------------|-----------|
|                             | Intra-day                   | Inter-day | Intra-day     | Inter-day |
| 8                           | 7.93                        | 7.88      | 4.9           | 9.29      |
| 15                          | 14.86                       | 14.91     | 8.5           | 4.36      |
| 25                          | 24.82                       | 24.91     | 6.66          | 9.61      |
| 35                          | 34.92                       | 34.89     | 3.06          | 0.57      |
| 45                          | 44.83                       | 44.82     | 9.17          | 3.51      |
| 55                          | 54.9                        | 54.89     | 7.00          | 2.52      |

RSD: Relative Standard Deviation.

**Table S4:** Stability of the AgCDs/Au electrode, 15 pg/mL MG and LMG each day.

| Day | added (pg/mL) <sup>a</sup> | Found (pg/mL) <sup>b</sup> | Recovery (%) | RSD (%) (n=3) |
|-----|----------------------------|----------------------------|--------------|---------------|
| 1   | 15                         | 14.92                      | 99.47        | 3.05          |
| 2   | 15                         | 14.87                      | 99.13        | 2.52          |
| 3   | 15                         | 14.89                      | 99.27        | 1.00          |
| 4   | 15                         | 14.88                      | 99.20        | 2.65          |
| 5   | 15                         | 14.86                      | 99.06        | 2.52          |
| 6   | 15                         | 14.84                      | 98.93        | 2.08          |
| 7   | 15                         | 14.85                      | 99.00        | 1.53          |
| 8   | 15                         | 14.82                      | 98.8         | 1.50          |
| 9   | 15                         | 14.79                      | 98.60        | 3.10          |
| 10  | 15                         | 14.81                      | 98.73        | 4.58          |
